# Supplementary material for: Postprandial glycaemia-lowering effect of a green tea cultivar Sunrouge and cultivar-specific metabolic profiling for determining bioactivity-related ingredients
Source: PubMed Central journal article supplement (PMC6207662; doi:10.1038/s41598-018-34316-8), 2018-10-30
Supplement: 41598_2018_34316_MOESM1_ESM.pdf [file 41598_2018_34316_MOESM1_ESM.pdf]

**Postprandial glycaemia-lowering effect of a green tea cultivar Sunrouge and cultivar-specific metabolic profiling for determining bioactivity-related ingredients**

Masafumi Wasai<sup>a,b</sup>, Yoshinori Fujimura<sup>b</sup>, Haruna Nonaka<sup>b</sup>, Ryo Kitamura<sup>b</sup>, Motoki Murata<sup>b</sup>, Hirofumi Tachibana<sup>b,\*</sup>

<sup>a</sup>Research Laboratory, Nippon Paper Industries Co., Ltd, Japan

<sup>b</sup>Division of Applied Biological Chemistry, Department of Bioscience and Biotechnology, Faculty of Agriculture, Kyushu University, Fukuoka, Japan

\*Corresponding author: Division of Applied Biological Chemistry, Department of Bioscience and Biotechnology, Faculty of Agriculture, Kyushu University, 744 Motooka, Nishi-ku, Fukuoka 819-0395, Japan. Phone & Fax: +81-92-802-4749; E-mail: [tatibana@agr.kyushu-u.ac.jp](mailto:tatibana@agr.kyushu-u.ac.jp)

Running title: Anti-hyperglycemic green tea cultivar ‘Sunrouge’

**Table S1. Forty-two kinds of the representative Japanese green tea cultivars.**

| No. | Cultivar       | No. | Cultivar               |
|-----|----------------|-----|------------------------|
| 1   | Seishin-oolong | 22  | Yamatomidori           |
| 2   | Fukumidori     | 23  | Asatsuyu               |
| 3   | Benifuji       | 24  | Toyoka                 |
| 4   | Minekaori      | 25  | Yaeho                  |
| 5   | Benihikari     | 26  | Ujihikari              |
| 6   | Minamikaori    | 27  | Ooiwase                |
| 7   | Benihomare     | 28  | Gokou                  |
| 8   | Izumi          | 29  | Surugawase             |
| 9   | Fuusyuum       | 30  | Samidori               |
| 10  | Tamamidori     | 31  | Komakage               |
| 11  | Ohba-oolong    | 32  | Hatsumomiji            |
| 12  | Seishintaipan  | 33  | Ryofuu                 |
| 13  | Kuritawase     | 34  | Minamisayaka           |
| 14  | Syunmei        | 35  | Saemidori              |
| 15  | Sayamamidori   | 36  | Okuyutaka              |
| 16  | Asagiri        | 37  | Okumidori              |
| 17  | Hokumei        | 38  | Yutakamirodi           |
| 18  | Asahi          | 39  | Yabukita               |
| 19  | Sayamakaori    | 40  | Benifuuki              |
| 20  | Meiryoku       | 41  | Cha Chuukanbohon Nou 6 |
| 21  | Kanayamidori   | 42  | Sunrouge               |

**Table S3. Composition of tea extract powders.**

| Ingredient                               | Sunrouge       | Yabukita       |
|------------------------------------------|----------------|----------------|
|                                          | extract powder | extract powder |
|                                          | (mg/g)         | (mg/g)         |
| Catechin                                 | 2.9            | 6.9            |
| Catechin gallate                         | 0.2            | 1.3            |
| Epicatechin                              | 16.0           | 21.0           |
| Epicatechin gallate                      | 21.0           | 7.4            |
| Gallocatechin                            | 4.7            | 30.0           |
| Gallocatechin gallate                    | 2.3            | 11.0           |
| Epigallocatechin                         | 59.0           | 82.0           |
| Epigallocatechin gallate                 | 120.0          | 42.0           |
| Epigallocatechin-3-O-(3-O-methyl)gallate | 4.7            | 0              |
| Total catechins                          | 230.8          | 201.6          |

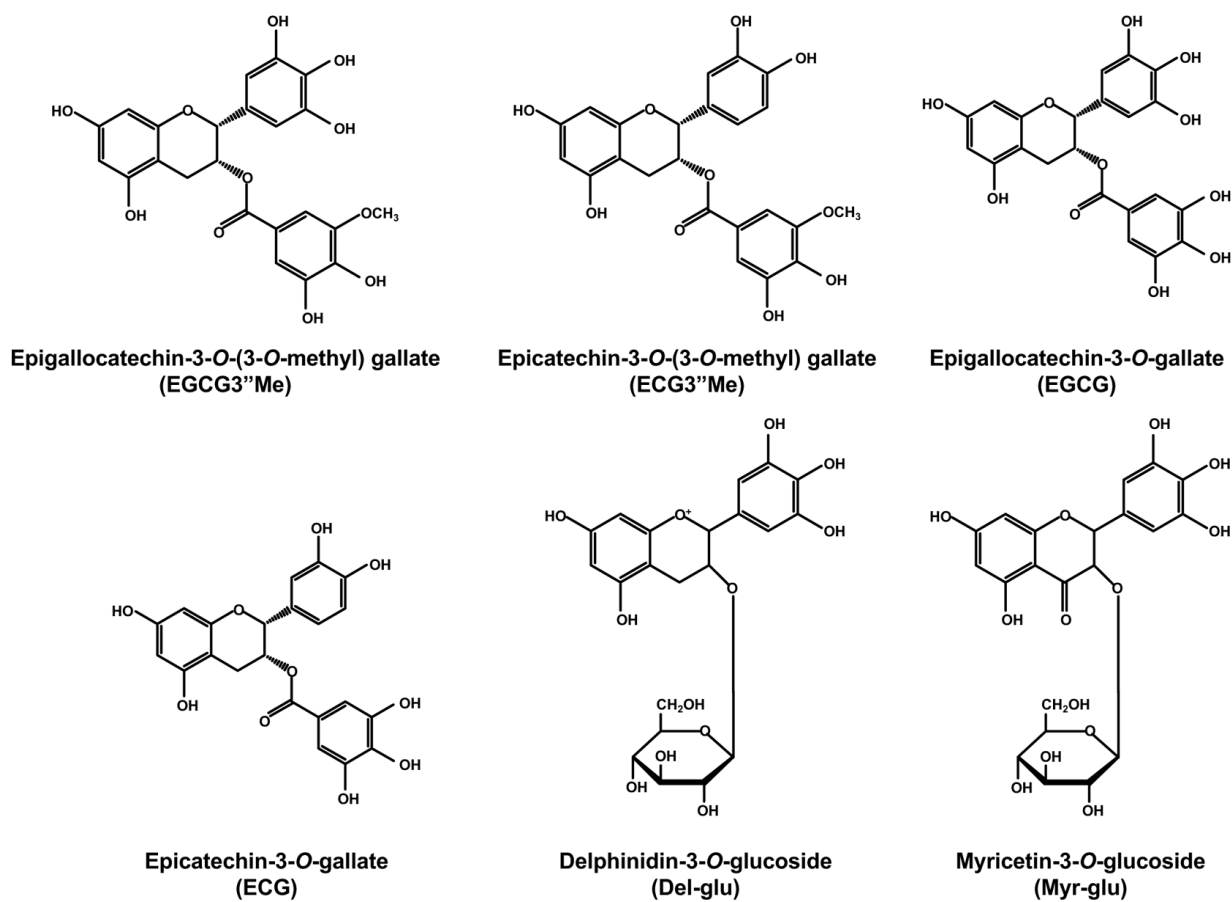

**Fig. S1. Chemical structures of compounds, showing positive correlation with  $\alpha$ -glucosidase inhibitory rate, that contributed strongly to the construction of the bioactivity-prediction OPLS regression model.**

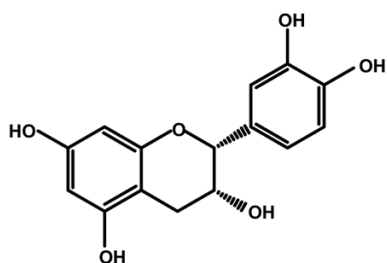

**Epicatechin (EC)**

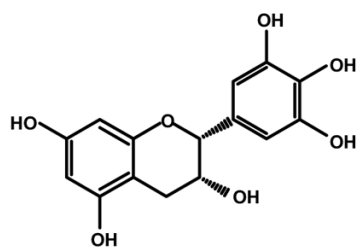

**Epigallocatechin (EGC)**

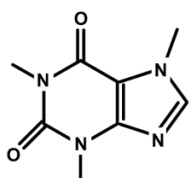

**Caffeine**

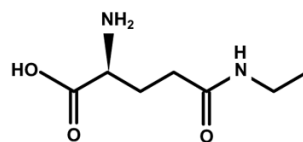

**Theanine**

**Fig. S2. Chemical structures of compounds, showing negative correlation with  $\alpha$ -glucosidase inhibitory rate, that contributed strongly to the construction of the bioactivity-prediction OPLS regression model.**

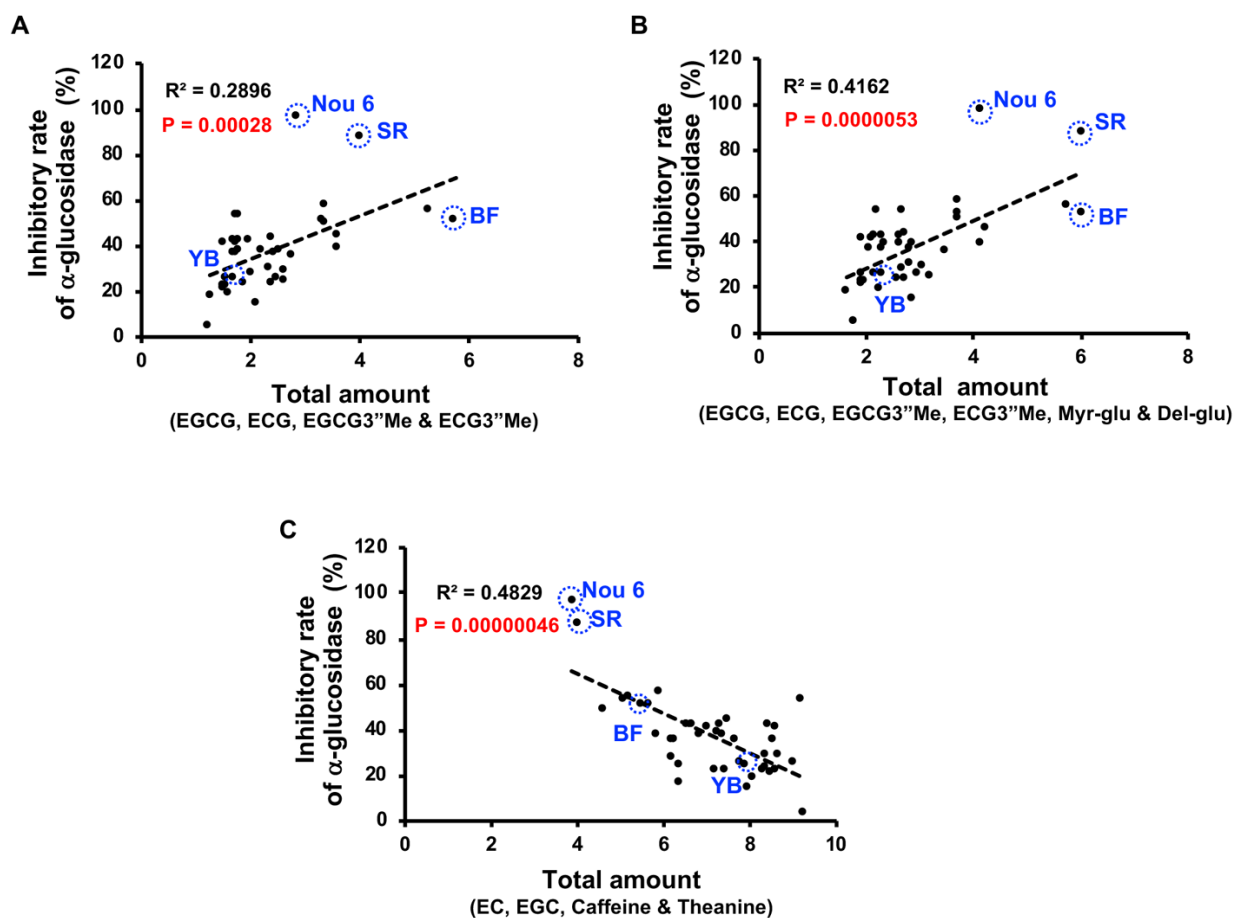

**Fig. S3. The correlation plot between the total amounts of the representative compounds with large VIP values and the  $\alpha$ -glucosidase inhibitory rates of 41 green tea cultivars.** Single regression model was created to examine the potential relationship between the total amounts of 4 or 6 compounds (**A**: EGCG + ECG + EGCG3''Me + ECG3''Me; **B**: EGCG + ECG + EGCG3''Me + ECG3''Me + Myr-Glu + Del-glu; **C**: EC + EGC + Caffeine + Theanine) and the  $\alpha$ -glucosidase inhibitory rates of 41 green tea cultivars. (**A** and **B**) Positively correlated compounds with the  $\alpha$ -glucosidase inhibitory rates. (**C**) Negatively correlated compounds. SR: Sunrouge; Nou 6: Cha Chuukanbohon Nou 6; BF: Benifuuki; YB: Yabukita.

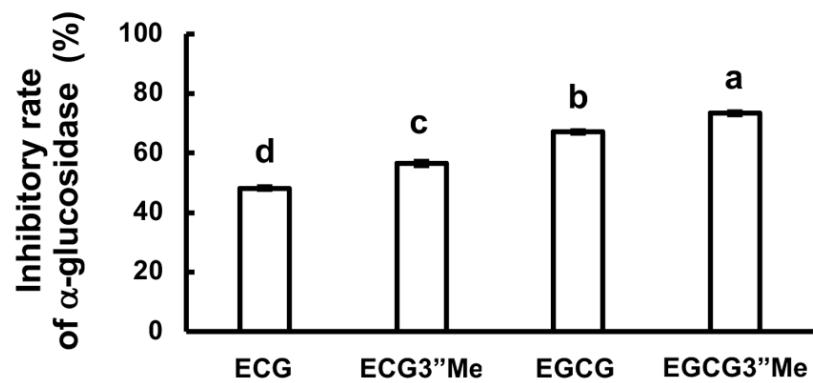

**Fig. S4. The effect of gallated catechins on  $\alpha$ -glucosidase activity.** The activity of  $\alpha$ -glucosidase was measured using each gallated catechin (ECG, ECG3''Me, EGCG or EGCG3''Me) at the concentration of 10  $\mu$ M. Turkey's Multiple Comparison Test,  $n=3$ . Different letters are statistically different,  $P < 0.05$ .

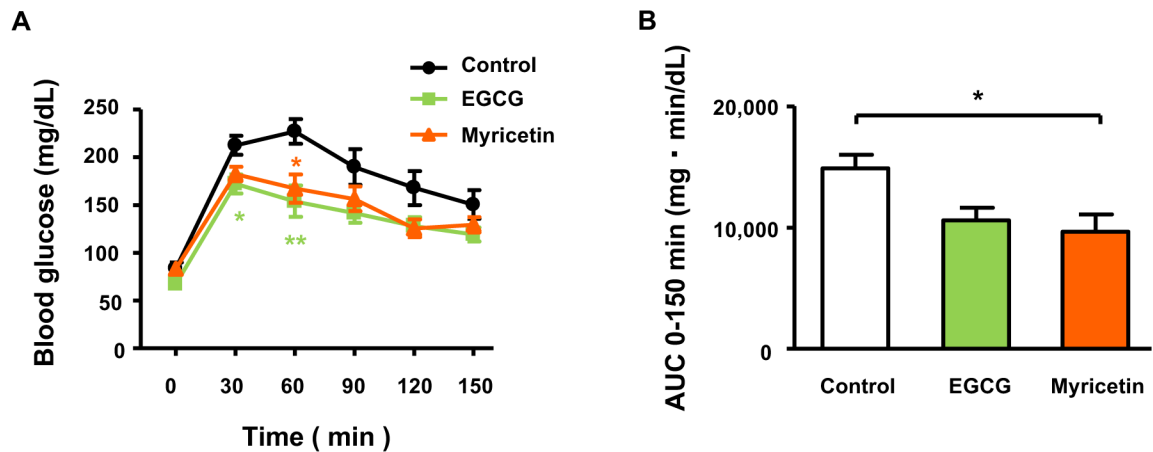

**Fig. S5. Effect of EGCG or myricetin on postprandial blood glucose in mice.** Mice were treated with EGCG or myricetin (500 mg/kg b.w.) in combination with soluble starch (2,000 mg/kg b.w.). **(A)** Postprandial blood glucose levels are shown at each time point after oral dosing of starch. **(B)** Calculated area under the curve (AUC) is shown during the whole time period (0–150 min). Turkey's Multiple Comparison Test, \* $P < 0.05$ , \*\* $P < 0.01$  vs. Control.



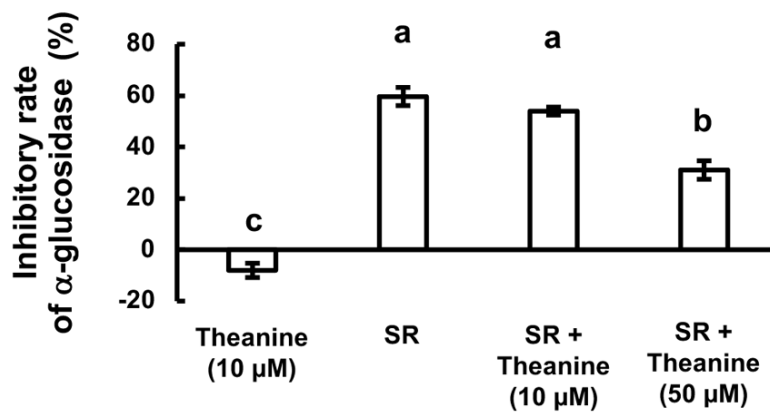

**Fig. S6. Effect of theanine on  $\alpha$ -glucosidase activity.** The activity of  $\alpha$ -glucosidase was measured using theanine or Sunrouge (SR) extract with or without theanine. Turkey's Multiple Comparison Test,  $n=3$ . Different letters are statistically different,  $P < 0.05$ .

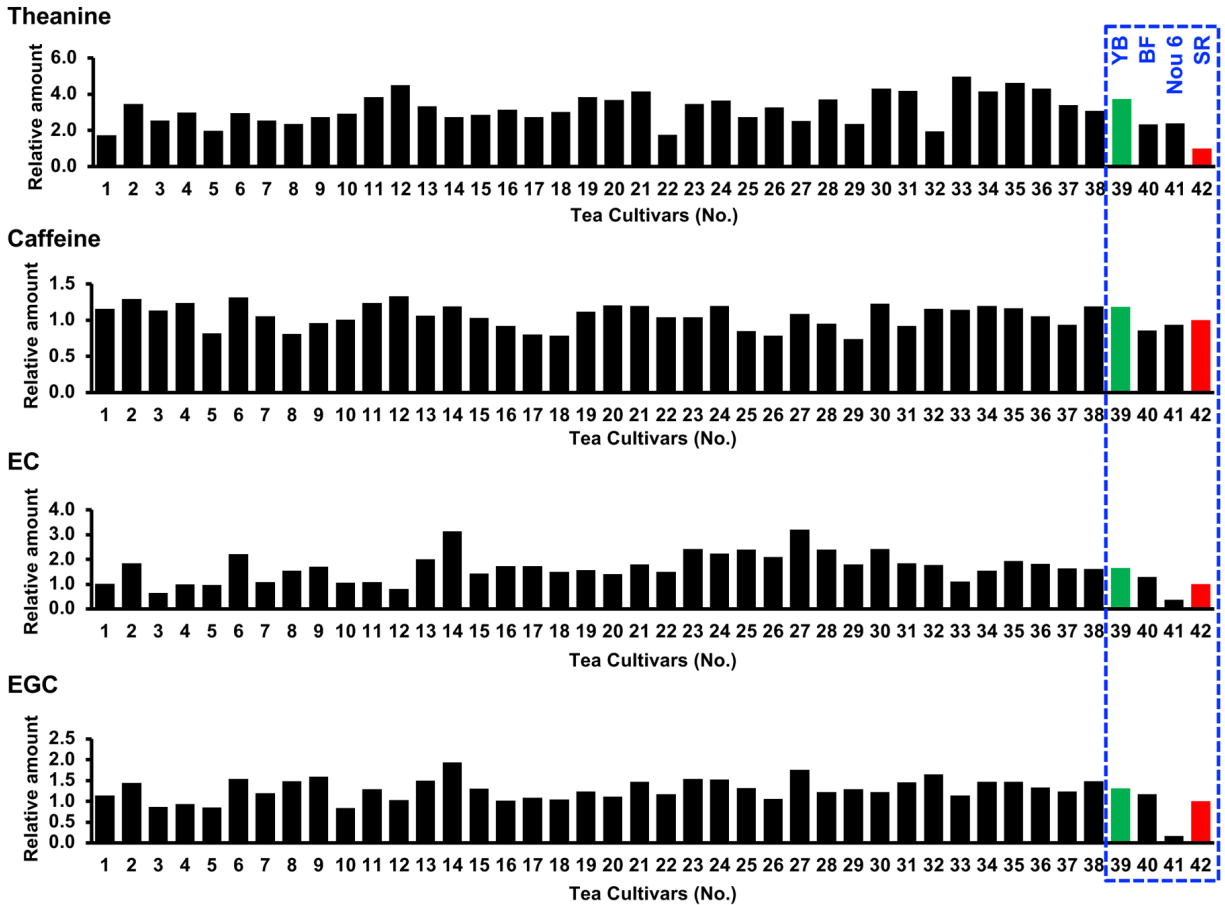

**Fig. S7.** The relative amount of the representative compounds showing negative correlation with  $\alpha$ -glucosidase inhibitory rate in 42 green tea extracts. The relative amounts were calculated from the intensity data of MS profiles of 42 green tea cultivars (Supplementary Table S2) and represented as the relative value of each cultivar to the Sunrouge. SR: Sunrouge; Nou 6: Cha Chuukanbohon Nou 6; BF: Benifuuki; YB: Yabukita.
